# Supplementary material
Source: publisher site journal article supplement (https://en-cdn.bio-protocol.org/attached/file/20200426/Supplementary%20table%20S4.xlsx)
Supplement: Supplementary file 1 [file Supplementary%20table%20S4.xlsx]

## Sheet: Sheet1
Modification residue	Main writer (when available)	Simplified biological role
H3 R2me1,me2a	CARM1	Gene expression
H3 R2me1,me2s	PRMT5	Gene expression
H3 R2me1,me2a	PRMT6	Gene expression
H3 R2me1,me2s	PRMT7	Gene expression
H3 K4ac	GCN5	Transcription activation at some promoters
H3 K4me1-3	SETD1A	Transcriptional activation (All)
H3 K4me1-3	SETD1B	Transcriptional activation (All)
H3 K4me1-3	MLL	Gene activation
H3 K4me1-3	MLL2	Transcriptional activation (All)
H3 K4me1-3	MLL3	Transcriptional activation (All)
H3 K4me1-3	MLL4	Transcriptional activation (All)
H3 K4me1-3	ASH1L	Gene activation
H3 K4me1	SETD7	Transcriptional activation
H3 K4me2-3	SMYD3	Transcriptional activation
H3 T6ph	PKCbeta	Inhibits AR-dependent transcription
H3 R8me1,me2s	PRMT5	Transcriptional repression
H3 K9ac	SAGA	Transcriptional activation
H3 K9ac	GCN5	Transcriptional activation
H3 K9ac	SRC1	Nuclear receptor coactivator
H3 K9me2-3	SUV39H1	Pericentric heterochromatin
H3 K9me2-3	SUV39H2	Pericentric heterochromatin
H3 K9me2-3	ESET	Transcriptional repression
H3 K9me2-3	SETDB1	Transcriptional repression
H3 K9me1-2	G9a	Transcriptional repression, Imprinting
H3 K9me1-2	EHMT1/GLP	Transcriptional repression
H3 K9me2	PRDM2/RIZ1	Tumor suppression and response to female sex hormones
H3 S10ph	Msk1	Transcriptional activation of immediate early genes (in concert with H3-K14 acetylation)
H3 S10ph	Msk2	Transcriptional activation of immediate early genes (in concert with H3-K14 acetylation)
H3 S10ph	IKKα	Transcriptional upregulation
H3 S10ph	Ip11/AuroraB	Mitotic chromosome condensation
H3 S10ph	NIMA	Mitotic chromosome condensation
H3 K14ac	Gcn5	Transcriptional activation
H3 K14ac	TAFII230	Transcriptional activation
H3 K14ac	TAFII250	Transcriptional activation
H3 K14ac	p300	Transcriptional activation
H3 K14ac	PCAF	Transcriptional activation
H3 K14ac	SRC1	Nuclear receptor coactivator
H3 R17me1,me2a	CARM1	Transcriptional activation (in concert with H3-K18/23 acetylation)
H3 K18ac	SAGA	Transcriptional activation
H3 K18ac	GCN5	Transcriptional activation
H3 K18ac	p300	Transcriptional activation
H3 K18ac	CBP	Transcriptional activation (in concert with H3-R17 methylation)
H3 K23ac	SAGA	Transcriptional activation
H3 K23ac	CBP	Transcriptional activation (in concert with H3-R17 methylation)
H3 R26me1,me2a	CARM1	In vitro methylation site
H3 K27ac	CBP	Enhancer function, gene expression
H3 K27me3	E(z)/EZH2	Polycomb repression, Early B-cell development, X chromosome inactivation
H3 S28ph	Aurora-B	Mitotic chromosome condensation
H3 S28ph	MSK1	UVB induced phosphorylation
H3 K36me2	MES-4	Dosage compensation in germline
H3 K36me3	MET-1	Meiosis
H3 K36me3	MES4	Transcription elongation
H3 K36me3	SET2	Transcription elongation
H3 K36me1-3	SETD2	Transcription activation
H3 K36me1-2	NSD1-3	Transcription activation
H3 K36ac	GCN5	Promoter mark on active genes
H3 Y41ph	JAK2	Gene expression
H3 R43me	CARM1	Transcriptional activation
H3 K56ac	SPT10	Transcriptional activation; DNA damage
H3 K56me1	G9a	DNA replication
H3 K56me3	Suv39h	Heterochromatin
H3 K64ac	p300	Nucleosome dynamics and transcription
H3 K64me3		Pericentric heterochromatin
H3 K79me1-3	Dot1/DOT1L	Telomeric silencing, pachytene checkpoint, DNA damage response
H3.3 K4me1-3		Transcriptional activation
H3.3 K9me1-2		Transcriptional repression
H3.3 K9ac		Transcriptional activation
H3.3 K14ac		Transcriptional activation
H3.3 K18ac		Transcriptional activation
H3.3 K23ac		Transcriptional activation
H3.3 K27me1-3		Transcriptional repression
H3.3 S31ph		Mitosis specific phosphorylation
H3.3 K36me1-3		Transcriptional activation
H3.3 K79me1-2		Transcriptional activation
H4 R3me1/me2a	PRMT1	transcriptional activation
H4 R3me1/me2s	PRMT5	transcriptional activation
H4 R3me1/me2a	PRMT6	transcriptional activation
H4 R3me1/me2s	PRMT7	transcriptional activation
H4 K5ac	ATF2	Sequence-specific TF
H4 K5ac	p300	transcriptional activation
H4 K5me1	Smyd3	Contributes to cancer phenotype
H4 K8ac	Y - ATF2	Excluded from Xi
H4 K8ac		Sequence-specific
H4 K8ac		transcription factor
H4 K8ac	PCAF/ p300	Transcriptional activation
H4 K12ac	HAT1	Excluded from Xi
H4 K12ac		Histone deposition
H4 K12bio	HCS	Decrease in response to DNA double-strand breaks
H4 K12bio	Biotinidase	Effects on cell proliferation
H4 K16ac	ATF2	Sequence-specific
H4 K16ac		transcription factor
H4 K20me	SETD8/Pr-SET7	Transcriptional silencing
H4 K20me1		mitotic condensation
H4 K59su	SUMO-1	Transciptional repression
H4 K59su	SUMO-3	Transciptional repression
H2A K5ac	Tip60, p300/CBP, Hat1	Transcriptional activation
H2A K9bio	HCS	Acetylation and methylation dependent
H2A K9bio	Biotinidase	Involved in cell proliferation, gene silencing and cellular response to DNA damage
H2A Q105me1	Nop1, fibrillarin	Ribosomal gene expression
H2A K119ub	dRing, RING1B	Polycomb silencing
H2A K119ub		UV-damage response
H2A K126bio	HCS	Acetylation and methylation dependent
H2A K126bio	Biotinidase	Involved in cell proliferation, gene silencing and cellular response to DNA damage
H2A K127bio	HCS	Acetylation and methylation dependent
H2A K127bio	Biotinidase	Involved in cell proliferation, gene silencing and cellular response to DNA damage
H2A K130bio	HCS	Acetylation and methylation dependent
H2A K130bio	Biotinidase	Involved in cell proliferation, gene silencing and cellular response to DNA damage
H2AX S139ph	ATM	DNA-repair
H2AX Y142ph	WSTF	DNA damage
H2B K5ac		Transcriptional activation
H2B S14ph	Mst1/krs2 kinase	Apoptosis
H2B S14ph		Somatic hypermutation and class
H2B S14ph		switch recombination
H2B K120ub	RNF20/40	Cell cycle progression in concert with SAGA for transcriptional activation through H3 methylation. DNA damage response. Meiosis
H1 T10ph		Mitosis specific
H1 T10ph		Transcriptional activation H1b
H1 S17ph		Interphase specific
H1 S17ph		Transcriptional activation H1b
H1 K26me2	EZH2	Mediates HP1 binding
H1 S27ph		Blocks HP1 binding
H1 T137ph		Mitosis specific
H1 T137ph		Transcriptional activation H1b
H1 T154ph		Mitosis specific
H1 T154ph		Transcriptional activation H1b
H1 S172ph		Interphase specific
H1 S172ph		Transcriptional activation H1b
H1 S188ph		Interphase specific
H1 S188ph		Transcriptional activation H1b
